1 **Capillary hemoglobin electrophoresis of healthy and anemic dogs: quantification,**  
2 **validation, and reference intervals of hemoglobin fractions**

3

4 Ioannis L. Oikonomidis<sup>1\*</sup>, Theodora K. Tsouloufi<sup>1</sup>, Mathios E. Mylonakis<sup>2</sup>, Maria Kritsepi-  
5 Konstantinou<sup>1</sup>

6

7 <sup>1</sup>Diagnostic Laboratory, School of Veterinary Medicine, Faculty of Health Sciences, Aristotle  
8 University of Thessaloniki, Thessaloniki, Greece

9 <sup>2</sup>Clinic of Companion Animal Medicine, School of Veterinary Medicine, Faculty of Health  
10 Sciences, Aristotle University of Thessaloniki, Thessaloniki, Greece

11

12 \* Corresponding author

13 E-mail: [ioannis.oikonomidis@ed.ac.uk](mailto:ioannis.oikonomidis@ed.ac.uk)

14

15 **Short title:** Capillary hemoglobin electrophoresis of healthy and anemic dogs

16

17

18

19

20

21

22

23

24

25

## 26 **Abstract**

27           Despite the advances in canine medicine and the rapid gaining of attention of canine  
28 models in biomedical field and particularly in hemoglobin genes research, the studies on canine  
29 hemoglobin composition are sparse with ambiguous findings. Our aim was: i) to investigate  
30 the electrophoretic pattern of canine hemoglobin and the possible effect of age, sex, and anemia  
31 using a capillary electrophoresis assay, and ii) to validate this assay and calculate reference  
32 intervals (RIs) for canine hemoglobin fractions. Blood samples were collected from 53 healthy  
33 and 42 dogs with regenerative and non-regenerative anemias. The Sebia Capillarys 2 flex-  
34 piercing was used for hemoglobin analysis and it was validated using canine blood samples. R  
35 statistical language was employed for the statistical analyses. A major hemoglobin fraction  
36 (named HbA<sub>0</sub>) and a minor one (named HbA<sub>2</sub>) were identified in 100% and 47.4% of samples,  
37 respectively. The within-run and between-run CV was 0.1% for HbA<sub>0</sub> and 9.1% and 11.2% for  
38 HbA<sub>2</sub>, respectively. The extremely narrow range of HbA<sub>0</sub> and HbA<sub>2</sub> values hampered a  
39 linearity study using canine blood samples. The RIs for HbA<sub>0</sub> and HbA<sub>2</sub> were 98.9-100% and  
40 0-1.1%, respectively. HbA<sub>0</sub> and HbA<sub>2</sub> values were not correlated with age ( $P=0.866$ ). No  
41 differences were observed in the median HbA<sub>0</sub> and HbA<sub>2</sub> between the two sexes ( $P=0.823$ ),  
42 and healthy and anemic dogs ( $P=0.805$ ). In conclusion, the capillary electrophoresis revealed  
43 a major hemoglobin fraction and an inconsistently present minor fraction. No effect of age,  
44 sex, or anemia was detected. The assay used was validated and RIs were generated, so as to be  
45 suitable for use in future investigations.

46

47

48

49

50

## 51 **Introduction**

52 Hemoglobin is the oxygen-carrying moiety of erythrocytes. Structurally, it is a globular  
53 polypeptide tetramer, which consists of two pairs of unlike globin chains that form a shell  
54 around a central cavity. The latter contains four oxygen-binding heme groups, each of which  
55 is covalently linked to a globin chain.

56 In healthy humans, hemoglobin consists of: i) a major fraction, HbA<sub>0</sub> ( $\alpha_2\beta_2$ ), which  
57 comprises approximately 95% of the total hemoglobin; ii) a minor fraction, HbA<sub>2</sub> ( $\alpha_2\delta_2$ ), which  
58 is normally less than 3.5% of total hemoglobin and iii) the fetal hemoglobin, HbF ( $\alpha_2\gamma_2$ ) [1]. In  
59 human medicine, more than 700 hemoglobinopathies have been described to date with most of  
60 them being clinically benign [2]. The term hemoglobinopathy is broadly used to describe both  
61 quantitative (thalassemias) and qualitative (true hemoglobinopathies) hemoglobin disorders  
62 [3]. However, in a strict sense, hemoglobinopathies and thalassemias are two genetically  
63 distinct groups of diseases, although clinical manifestations may overlap [1]. Specifically,  
64 thalassemias are characterized by a reduced production of the normal globin chain and may  
65 result from gene deletion or mutations that affect the transcription or stability of mRNAs [1].  
66 On the other hand, the vast majority of hemoglobinopathies, including the clinically important  
67 ones, result from single nucleotide substitutions that are translated to single amino acid  
68 substitutions, primarily in the non- $\alpha$  chain, causing alterations in the secondary and tertiary  
69 structures of hemoglobin tetramer [1, 4].

70 High pressure liquid chromatography (HPLC) and capillary zone electrophoresis (CZE)  
71 are the most widely used methods for human hemoglobin analysis and for the initial diagnosis  
72 of hemoglobinopathies, both of which have superior analytic and diagnostic performance when  
73 compared to other available methods, such as gel electrophoresis and mass spectroscopy [5].  
74 CZE allows the successful separation of the normal human hemoglobin fractions, but it can  
75 also detect abnormal hemoglobin variants with altered charge resulting either from mutations

76 that directly influence the charge of the molecule or indirectly from mutations that alter the  
77 higher-order structure [4]. In particular, Sebia Capillarys 2-flex piercing (Sebia, Norcross,  
78 USA), the updated model of Sebia Capillarys, has been successfully validated for human  
79 hemoglobin analysis and diagnosis of hemoglobinopathies [6]. Additionally, the same analyzer  
80 has been recently successfully validated for the measurement of the major fraction of glycated  
81 hemoglobin (HbA<sub>1c</sub>) in dogs [7].

82         Currently, there is a dearth of published studies on hemoglobin composition in dogs  
83 and they have been conducted almost half a century ago [8, 9], although dogs are rapidly  
84 gaining attention as potential models in various biomedical areas, while they are considered  
85 the ideal model particularly for the study of hemoglobin genes [10]. According to the above  
86 cited studies, no HbF is recognized in dogs, while a minor hemoglobin fraction may be detected  
87 [8, 9]. However, no further information is provided about the prevalence, quantification, and  
88 electrophoretic characteristics of the minor hemoglobin fraction. Only recently the minor  
89 hemoglobin fraction was quantified using acetate cellulose electrophoresis [11]. Surprisingly,  
90 the authors of this study also reported the presence of HbF in adult dogs, raising questions  
91 about our prior knowledge, but also about the utility of different assays for canine hemoglobin  
92 analysis [11].

93         In the aforementioned context, the objectives of this study were: i) to investigate the  
94 electrophoretic patterns of canine hemoglobin using a new automated capillary electrophoresis  
95 assay; ii) to study the effect of age, sex, and anemia unrelated to hemoglobin disorders on the  
96 electrophoretic pattern of canine hemoglobin; and iii) to validate the herein used assay for  
97 canine hemoglobin analysis and calculate appropriate reference intervals, so as to be suitable  
98 for use in future studies or in the clinical setting.

99

## 100 **Materials and methods**

101           The blood samples used in this study were aliquots of specimens collected (owners'  
102 consent provided) for diagnostic purposes, routine health check, or pre-operatively from  
103 healthy dogs referred to the Companion Animal Clinic, School of Veterinary Medicine, Faculty  
104 of Health Sciences, Aristotle University of Thessaloniki, Greece. The reference individuals  
105 were selected by a direct a priori method, based on the following inclusion criteria: age >6  
106 months, up-to-date vaccination and deworming status, no history of illness or medication in  
107 the preceding month, unremarkable physical examination, and normal complete blood count.  
108 Blood samplings were performed at admission by jugular venipuncture and the samples were  
109 collected into K3-ethylene diamine tetra-acetic acid (EDTA) coated tubes (Deltalab,  
110 Barcelona, Spain). Anemia was defined as red blood cell count  $<5.36 \times 10^9/L$ , or hemoglobin  
111 concentration  $<122 \text{ g/L}$ , or hematocrit  $<0.372 \text{ L/L}$  [12]. The anemia was classified as  
112 regenerative when the absolute reticulocyte count was  $>60,000/\mu\text{L}$  [13]. Grossly hemolysed  
113 (in vitro hemolysis) and lipemic samples were excluded from the study. A complete blood  
114 count was performed on the Advia 120 hematology analyzer (Siemens Healthcare Diagnostics,  
115 Deerfield, USA) within 2 h of sampling.

116           Hemoglobin electrophoresis was carried out within 4 h of sampling. Routine  
117 maintenance, assay and internal quality control procedures were conducted as defined in the  
118 analyser manuals. A normal electrophoretogram from a human patient was used for  
119 comparison. The automated analyser, Sebia Capillarys 2 flex-piercing, and the dedicated kit  
120 (Sebia, Norcross, USA) were used for the detection and quantification of different canine  
121 hemoglobin fractions as a percentage of total hemoglobin. The principle of the Capillarys 2  
122 flex-piercing assay is CZE, in which charged molecules are discriminated by their  
123 electrophoretic mobility in an alkaline buffer (pH 9.4). The analyser is equipped with eight  
124 silica capillaries, which enable the simultaneous analysis of eight whole blood samples. In

125 brief, the EDTA-treated whole blood sample is diluted with a hemolysing solution and the  
126 resulting solution is then hydrodynamically injected at the anodic end of the capillary. A  
127 constant, high voltage is applied for 8 min, which allows the migration and separation of the  
128 hemoglobin variants. These are then directly detected by spectrophotometry (415 nm) and the  
129 electrophoretograms are automatically generated. The total output time is approximately 20  
130 min for the first run and 12 min for every other run.

131 The validation of the analyzer was initially designed to include linearity, repeatability,  
132 and reproducibility. The repeatability or within-run precision was evaluated using blood  
133 samples from three dogs. Each sample was measured eight times in succession and the  
134 coefficient of variation (CV) was calculated. Blood samples from the same three dogs were  
135 used for the evaluation of reproducibility or between-run precision. Six aliquots were made  
136 from each sample and were measured over a period of 3 days; then, the CV was calculated.

137 The distribution of data was assessed using the Shapiro–Wilk test. The 95% reference  
138 intervals (RIs) were calculated using the non-parametric method, while the 90% confidence  
139 intervals (CIs) for the lower and upper reference limits were calculated by the bootstrap  
140 method. Cook’s method was employed for the detection of outliers. For the determination of  
141 reference intervals, the R package referenceIntervals was used. The exact Wilcoxon and  
142 Kruskal-Wallis rank-sum tests were employed for median comparison between two or three  
143 different groups, respectively. Spearman’s rank correlation coefficients were used for  
144 correlation analyses. All the statistical analyses were conducted using the statistical language  
145 R (R Foundation for Statistical Computing, Vienna, Austria). Level of significance was set at  
146 0.05 ( $P < 0.05$ ).

147

## 148 **Results**

149 In total, 95 dogs were sampled. The reference population comprised 53 dogs (27 males  
150 and 26 females) with mean ( $\pm$ SD) age of  $6.0\pm 3.8$  years and hemoglobin concentration of  
151  $155\pm 16$  g/L. The anemic population comprised 42 dogs (19 males and 23 females) with mean  
152 ( $\pm$ SD) age of  $6.6\pm 4.1$  years and hemoglobin concentration of  $75\pm 27$  g/L. The anemia was  
153 classified as non-regenerative in 16/42 (38.1%) dogs and regenerative in 26/42 (61.9%) dogs.

154 The inspection of the electrophoretograms revealed one major and one minor  
155 hemoglobin fraction. The major canine hemoglobin fraction migrated slower towards the anode  
156 than the respective human HbA<sub>0</sub> (Fig 1) and it was consistently present in all examined samples  
157 (95/95, 100%). The minor fraction migrated slightly slower towards the anode compared to  
158 human HbA<sub>2</sub> and it was evident in 26/53 (49.1%) reference individuals and in 19/42 (45.2%)  
159 anemic dogs. For the purposes of this study, we refer to the major canine hemoglobin fraction  
160 as HbA<sub>0</sub> and to the minor one as HbA<sub>2</sub>.

161

162 **Fig 1. Two representative hemoglobin electrophoretograms from a healthy human (A)**  
163 **and a healthy dog (B).** The major (HbA<sub>0</sub>) and the adult minor (HbA<sub>2</sub>) hemoglobin fractions  
164 are depicted in both electrophoretograms. The major canine hemoglobin fraction migrates  
165 slower towards the anode than the respective human one. The minor fraction migrates slightly  
166 slower towards the anode compared to human HbA<sub>2</sub> and it is inconsistently present in dogs.

167

168 The total within-run and between-run CV for HbA<sub>0</sub> was 0.1%, while for HbA<sub>2</sub> was  
169 9.1% and 11.2%, respectively. Specificity (dilutional linearity study) using canine blood  
170 samples could not be performed due to the extremely narrow range of HbA<sub>0</sub> and HbA<sub>2</sub>  
171 percentages in our canine population. No outliers were detected in the reference population  
172 using Cook's method. The 95% RI for HbA<sub>0</sub> was 98.9-100% with the CIs for the lower and

173 upper reference limits being 98.8-99.0% and 100%, respectively. The 95% RI for HbA<sub>2</sub> was  
174 0-1.1% with the CIs for the lower and upper reference limits being 0 and 1.0-1.2%,  
175 respectively.

176 HbA<sub>0</sub> and HbA<sub>2</sub> values were not significantly correlated with age ( $P=0.866$ ). No  
177 statistically significant difference ( $P=0.823$ ) was observed in the median HbA<sub>0</sub> and HbA<sub>2</sub>  
178 between male and female dogs. The median (range) HbA<sub>0</sub> and HbA<sub>2</sub> was 100% (98.9-100%)  
179 and 0% (0-1.1%), respectively, in both sexes. No statistically significant difference ( $P=0.805$ )  
180 was detected in the median (range) HbA<sub>0</sub> and HbA<sub>2</sub> between the reference population [100%  
181 (98.9-100%) and 0% (0-1.1%), respectively] and dogs with non-regenerative [100% (98.9-  
182 100%) and 0% (0-1.1%), respectively] or regenerative anemia [100% (99.0-100%) and 0% (0-  
183 1.0%), respectively] (Fig 2).

184

185 **Fig 2. Boxplots of the major (A) and minor (B) hemoglobin fraction values of the**  
186 **reference populations and dogs with non-regenerative or regenerative anemia are**  
187 **depicted.** The colored boxes represent the main body of data; they are bisected by a line, which  
188 stands for the median value. No statistically significant difference ( $P=0.805$ ) was detected in  
189 the median values of both canine hemoglobin fractions between the three groups.

190

## 191 **Discussion**

192 In this study, the electrophoretic pattern of canine hemoglobin was investigated using  
193 a new automated capillary electrophoresis assay. This assay was validated for canine  
194 hemoglobin analysis and appropriate reference intervals were calculated for adult dogs. The  
195 effect of age and sex on canine hemoglobin electrophoretic pattern was also evaluated. Finally,  
196 we investigated if anemias that were not attributed to a hemoglobin disorder, could affect the  
197 hemoglobin electrophoretic pattern.



198           The inspection of the electrophoretograms revealed two hemoglobin fractions: one  
199 major fraction that was constantly present in all of the enrolled dogs and one minor fraction  
200 that was detected in approximately half of the dogs. The major canine hemoglobin fraction was  
201 found to migrate slower towards the anode compared to human HbA<sub>0</sub>, while the minor canine  
202 hemoglobin fraction migrated slightly slower than human HbA<sub>2</sub>. A third hemoglobin fraction  
203 consistent with HbF was not detected in any of the dogs included in this study. Our findings  
204 are in agreement with previous studies using gel electrophoresis, which reported the absence  
205 of HbF and the presence of one or two hemoglobin fractions in dogs [8, 9]. However, in the  
206 aforementioned studies, no further information was provided about the electrophoretic features,  
207 the prevalence, and the quantification of the different hemoglobin fractions. The  
208 characterization of HbA<sub>2</sub> was only recently done in canine samples [11]. In this study, the  
209 prevalence of HbA<sub>2</sub> in healthy dogs was higher, yet similar to ours (64.1% versus 49.1%,  
210 respectively). However, the range of HbA<sub>2</sub> value was wider and roughly three times the one  
211 reported in our study. However, Atyabi et al. surprisingly reported the presence of HbF in  
212 50.0% of their samples [11], as opposed to current and previously published studies [8, 9],  
213 which reported the absence of canine HbF. The source of the observed discrepancy between  
214 the study of Atyabi et al. [11] and the rest of the published studies, including the present one,  
215 cannot be easily explained. Be that as it may, both preanalytic (handling and storage of the  
216 blood samples) and analytic factors (inherent limitations of the used method) may have  
217 contributed to the observed differences. This further underlines the need to utilize  
218 contemporary methods and properly validate them for use in different species.

219           HPLC and CZE are the most widely used methods for human hemoglobin analysis and  
220 for the initial diagnosis of hemoglobinopathies [5]. These two methods have comparable results  
221 and share some major advantages, such as the accuracy, rapidness, and high throughput;  
222 however, each of them has its disadvantages, primarily referring to inability for identification

223 of some human-specific hemoglobin variants [5]. However, a major advantage of CZE over  
224 HPLC, which is potentially applicable to different species, is the substantially better  
225 visualization of the results; indeed, post-translational modification and degradation peaks are  
226 often present in HPLC chromatograms, potentially making the interpretation problematic [5].  
227 Gel electrophoresis and mass spectroscopy can likewise be used for the hemoglobin analysis  
228 and diagnosis of hemoglobinopathies; notwithstanding, a major disadvantage is recognized in  
229 both of them. Gel electrophoresis is characterized by an inherent lower accuracy and sensitivity  
230 [5], while mass spectroscopy is unable to detect intact globin chains with a slightly different  
231 mass, reportedly less than 6 Da [14].

232         The capillary electrophoresis assay used in this study has been recently successfully  
233 validated for the measurement of canine HbA<sub>1c</sub> [7]. However, to our knowledge, this is the first  
234 time that this assay is utilized for canine hemoglobin electrophoresis and thus, a study of the  
235 analytic performance of this assay is valuable. The repeatability and reproducibility of this  
236 assay for HbA<sub>0</sub> measurement, using canine blood samples, was excellent and in agreement with  
237 studies in human medicine [6]. However, the within-run and between-run CV for HbA<sub>2</sub>  
238 measurement was considerably higher than the one reported for human HbA<sub>2</sub> [6]. The higher  
239 imprecision in canine HbA<sub>2</sub> measurement can be attributed, at least partially, to the extremely  
240 low values of the HbA<sub>2</sub> in dogs, which are not normally seen in humans; however, the  
241 performance is likely acceptable for use, although this cannot be clearly stated given the  
242 absence of specific performance goals in dogs. It should be noted that none of the previously  
243 used assays for canine hemoglobin electrophoresis was validated for use in dogs. Additionally,  
244 appropriate RIs were calculated for adult dogs with the range for both hemoglobin fractions  
245 being narrower compared to human one. Finally, the age and sex do not appear to have an  
246 effect on canine hemoglobin electrophoretic pattern, in accordance to human studies reporting

247 only a minimal, effect of age and sex, and the study by Atyabi et al. which found no difference  
248 between male and female dogs [11, 15].

249         Given that anemia (of variable severity) is the usual clinical manifestation of  
250 hemoglobinopathies in humans [3], we also decided to investigate whether anemias  
251 (regenerative or non-regenerative) that were not related to hemoglobin disorders, might have  
252 an effect on the electrophoretic pattern of canine hemoglobin. No quantitative or qualitative  
253 hemoglobin abnormalities were detected in the electrophoretic pattern of anemic dogs when  
254 compared to our reference population. In spite of the small sample size of anemic dogs, this  
255 finding indicates that an anemia not attributable to a hemoglobin disorder does not interfere  
256 with the capillary electrophoresis assay used in our study.

257

## 258 **Conclusions**

259         The canine hemoglobin consists of a major fraction and a minor one, inconsistently  
260 present in very low proportions. A new automated capillary electrophoresis assay was validated  
261 for the separation of canine hemoglobin fractions and appropriate RIs were generated. Our  
262 study indicates no age or sex effect on hemoglobin electrophoretic pattern among adult dogs,  
263 while no quantitative or qualitative hemoglobin abnormalities were detected in the anemic dogs  
264 without evidence for a hemoglobin disorder. The capillary electrophoresis assay used in this  
265 study is the only validated assay that can be used in future research studies on canine  
266 hemoglobin or in clinical cases suspected of having a hemoglobin disorder.

267

## 268 **Acknowledgments**

269 The authors have no acknowledgements to state.

270

271

## 272 **References**

- 273 1. Clarke GM, Higgins TN. Laboratory Investigation of Hemoglobinopathies and  
274 Thalassemias: Review and Update. *Clinical Chemistry*. 2000;46(8):1284-90.
- 275 2. Carver MFH, Huisman THJ. International Hemoglobin Information Center Variant  
276 List. *Hemoglobin*. 1997;21(6):505-6. doi: 10.3109/03630269708999182.
- 277 3. Bain BJ. Haemoglobinopathy diagnosis: Algorithms, lessons and pitfalls. *Blood*  
278 *Reviews*. 2011;25(5):205-13. doi: <http://dx.doi.org/10.1016/j.blre.2011.04.001>.
- 279 4. Wada Y. Advanced analytical methods for hemoglobin variants. *Journal of*  
280 *Chromatography B*. 2002;781(1–2):291-301. doi: [http://dx.doi.org/10.1016/S1570-](http://dx.doi.org/10.1016/S1570-0232(02)00558-5)  
281 [0232\(02\)00558-5](http://dx.doi.org/10.1016/S1570-0232(02)00558-5).
- 282 5. Greene DN, Vaughn CP, Crews BO, Agarwal AM. Advances in detection of  
283 hemoglobinopathies. *Clinica Chimica Acta*. 2015;439:50-7. doi:  
284 <https://doi.org/10.1016/j.cca.2014.10.006>.
- 285 6. Greene DN, Pyle AL, Chang JS, Hoke C, Lorey T. Comparison of Sebia Capillary  
286 Flex capillary electrophoresis with the BioRad Variant II high pressure liquid chromatography  
287 in the evaluation of hemoglobinopathies. *Clinica Chimica Acta*. 2012;413(15–16):1232-8. doi:  
288 <http://dx.doi.org/10.1016/j.cca.2012.03.027>.
- 289 7. Oikonomidis IL, Tsouloufi TK, Soubasis N, Kritsepi-Konstantinou M. Validation,  
290 reference intervals and overlap performance of a new commercially available automated  
291 capillary electrophoresis assay for the determination of the major fraction of glycated  
292 haemoglobin (HbA1c) in dogs. *The Veterinary Journal*. 2018;234:48-54. doi:  
293 <https://doi.org/10.1016/j.tvjl.2018.02.005>.
- 294 8. Seal US. Carnivora systematics: A study of hemoglobins. *Comparative Biochemistry*  
295 *and Physiology*. 1969;31(5):799-811. doi: [http://dx.doi.org/10.1016/0010-406X\(69\)92080-5](http://dx.doi.org/10.1016/0010-406X(69)92080-5).

- 296 9. Kitchen H, Brett I. Embryonic and fetal hemoglobin in animals. *Annals of the New*  
297 *York Academy of Sciences*. 1974;241(1):653-71. doi: 10.1111/j.1749-6632.1974.tb21921.x.
- 298 10. Zaldívar-López S, Rowell JL, Fiala EM, Zapata I, Couto CG, Alvarez CE. Comparative  
299 genomics of canine hemoglobin genes reveals primacy of beta subunit delta in adult carnivores.  
300 *BMC Genomics*. 2017;18(1):141. doi: 10.1186/s12864-017-3513-0.
- 301 11. Atyabi N, Rahbarghazi R, Araghi A, Nequiejahromi O. Haemoglobin typing and its  
302 variations in Iranian domestic dogs. *Comp Clin Pathol*. 2012;21(6):1515-9. doi:  
303 10.1007/s00580-011-1322-4.
- 304 12. Oikonomidis IL, Tsouloufi TK, Papoutsi A, Kritsepi-Konstantinou M. Reference  
305 intervals for canine hematologic analytes using Siemens Advia 120. *Journal of the Hellenic*  
306 *Veterinary Medical Society*. 2018;69(3):1063-70.
- 307 13. Tvedten H. Laboratory and clinical diagnosis of anemia. In: Weiss DJ, K. WJ, editors.  
308 *Schalm's Veterinary Hematology*. 6th ed. Ames Iowa, USA: Wiley-Blackwell; 2010. p. 152-  
309 61.
- 310 14. Daniel YA, Turner C, Haynes RM, Hunt BJ, Neil Dalton R. Rapid and specific  
311 detection of clinically significant haemoglobinopathies using electrospray mass spectrometry–  
312 mass spectrometry. *British Journal of Haematology*. 2005;130(4):635-43. doi: 10.1111/j.1365-  
313 2141.2005.05646.x.
- 314 15. Menzel S, Garner C, Rooks H, Spector TD, Thein SL. HbA2 levels in normal adults  
315 are influenced by two distinct genetic mechanisms. *British Journal of Haematology*.  
316 2013;160(1):101-5. doi: 10.1111/bjh.12084.
- 317

**A**

bioRxiv preprint doi: <https://doi.org/10.1101/633198>; this version posted May 9, 2019. The copyright holder for this preprint (which was not certified by peer review) is the author/funder, who has granted bioRxiv a license to display the preprint in perpetuity. It is made available under aCC-BY 4.0 International license.

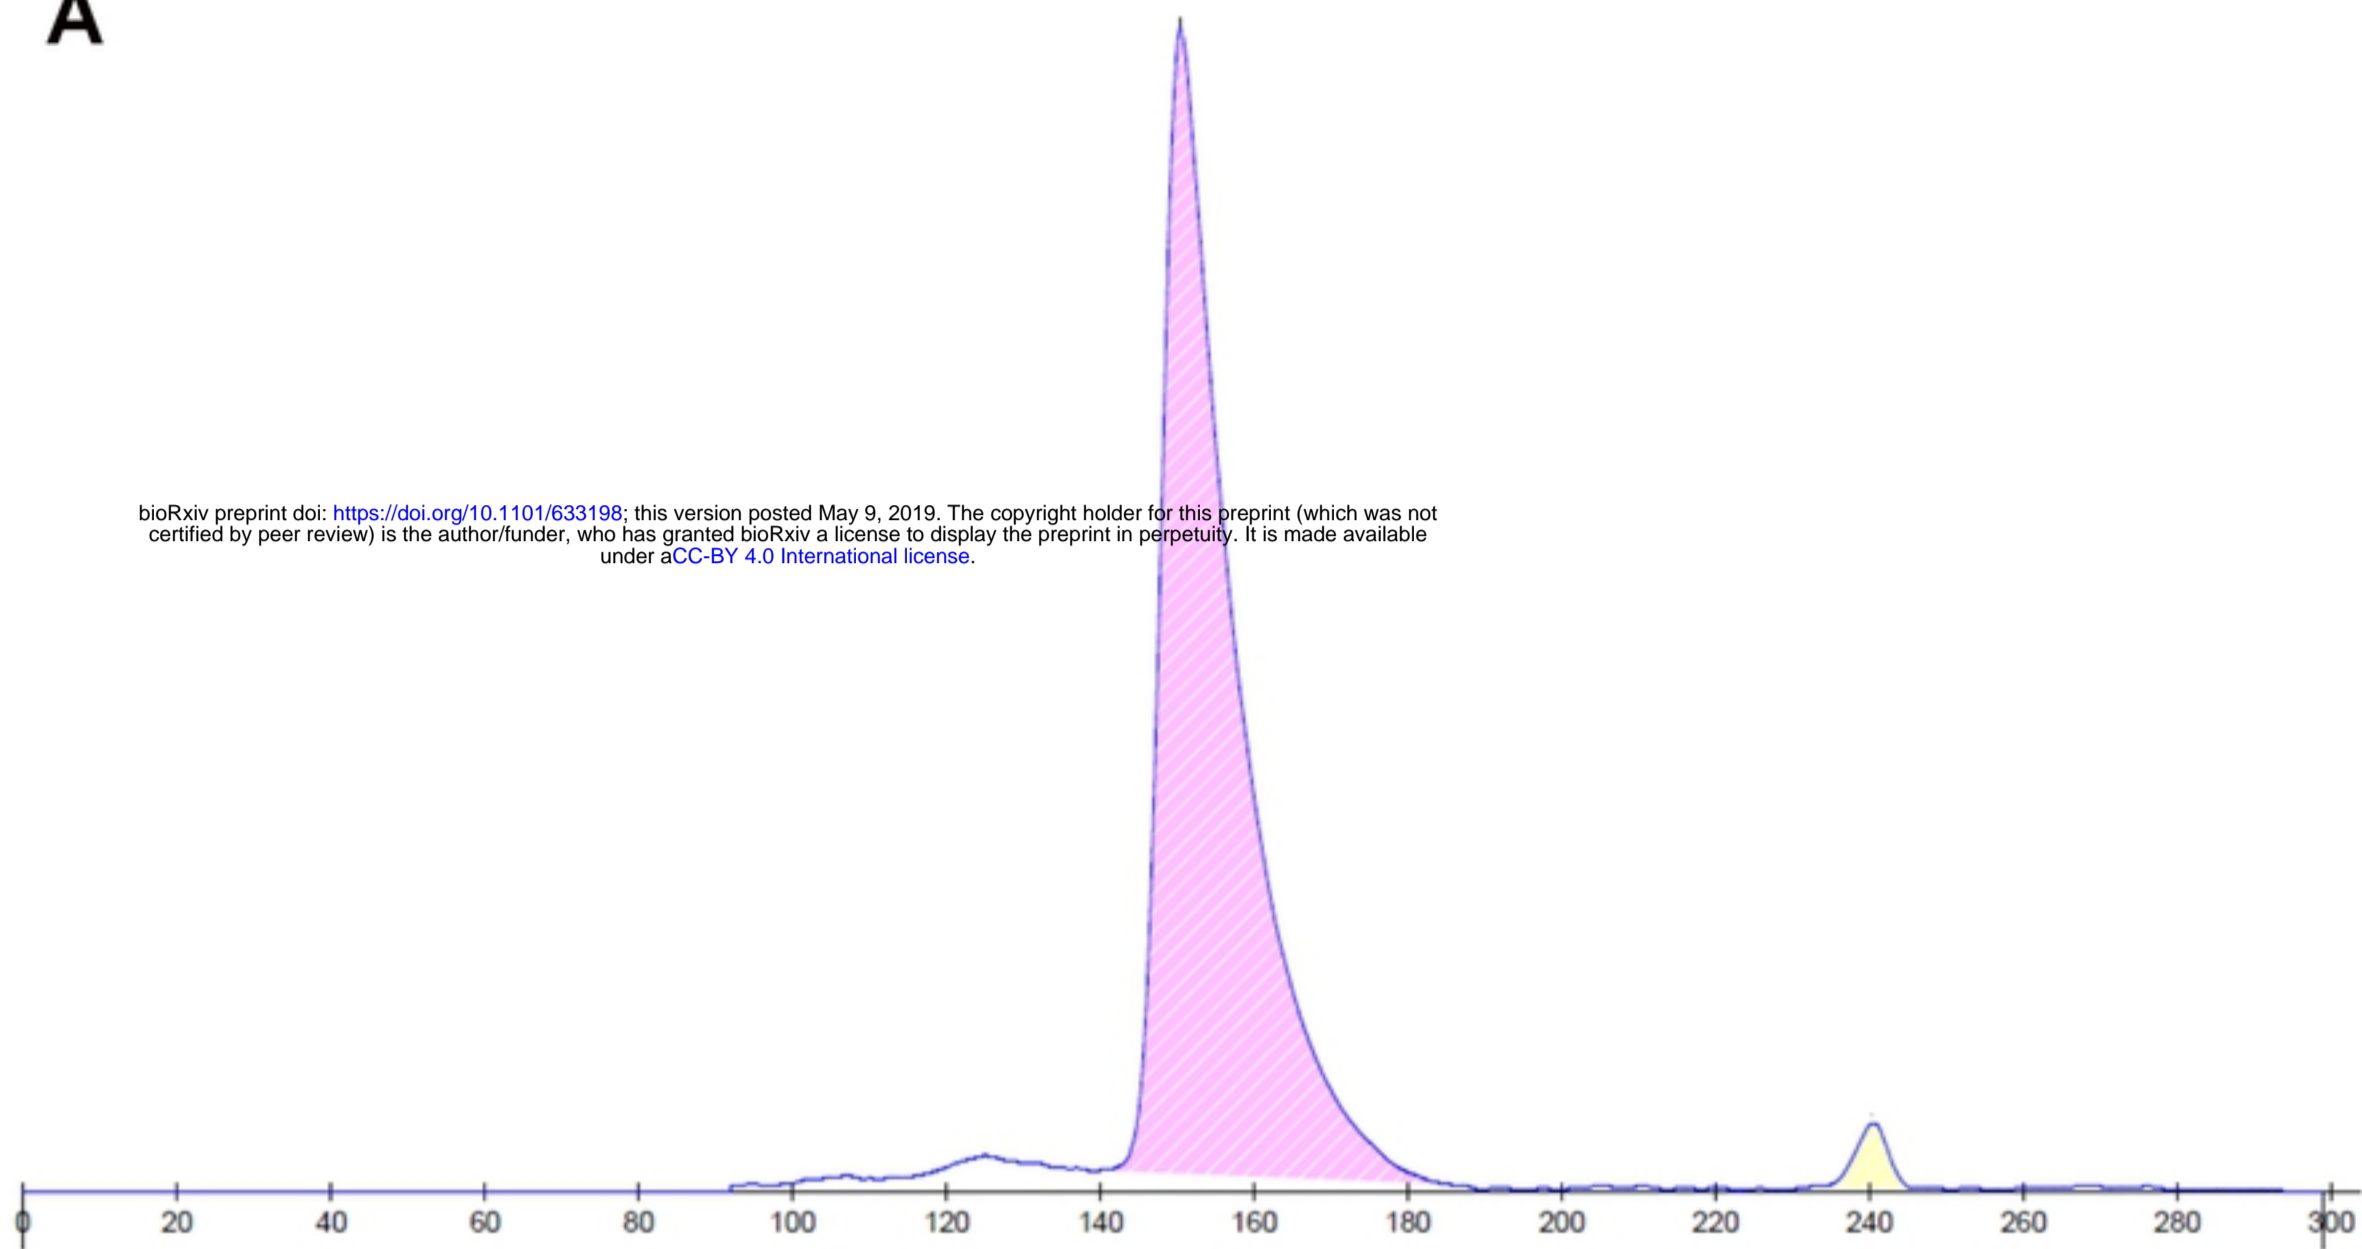**B**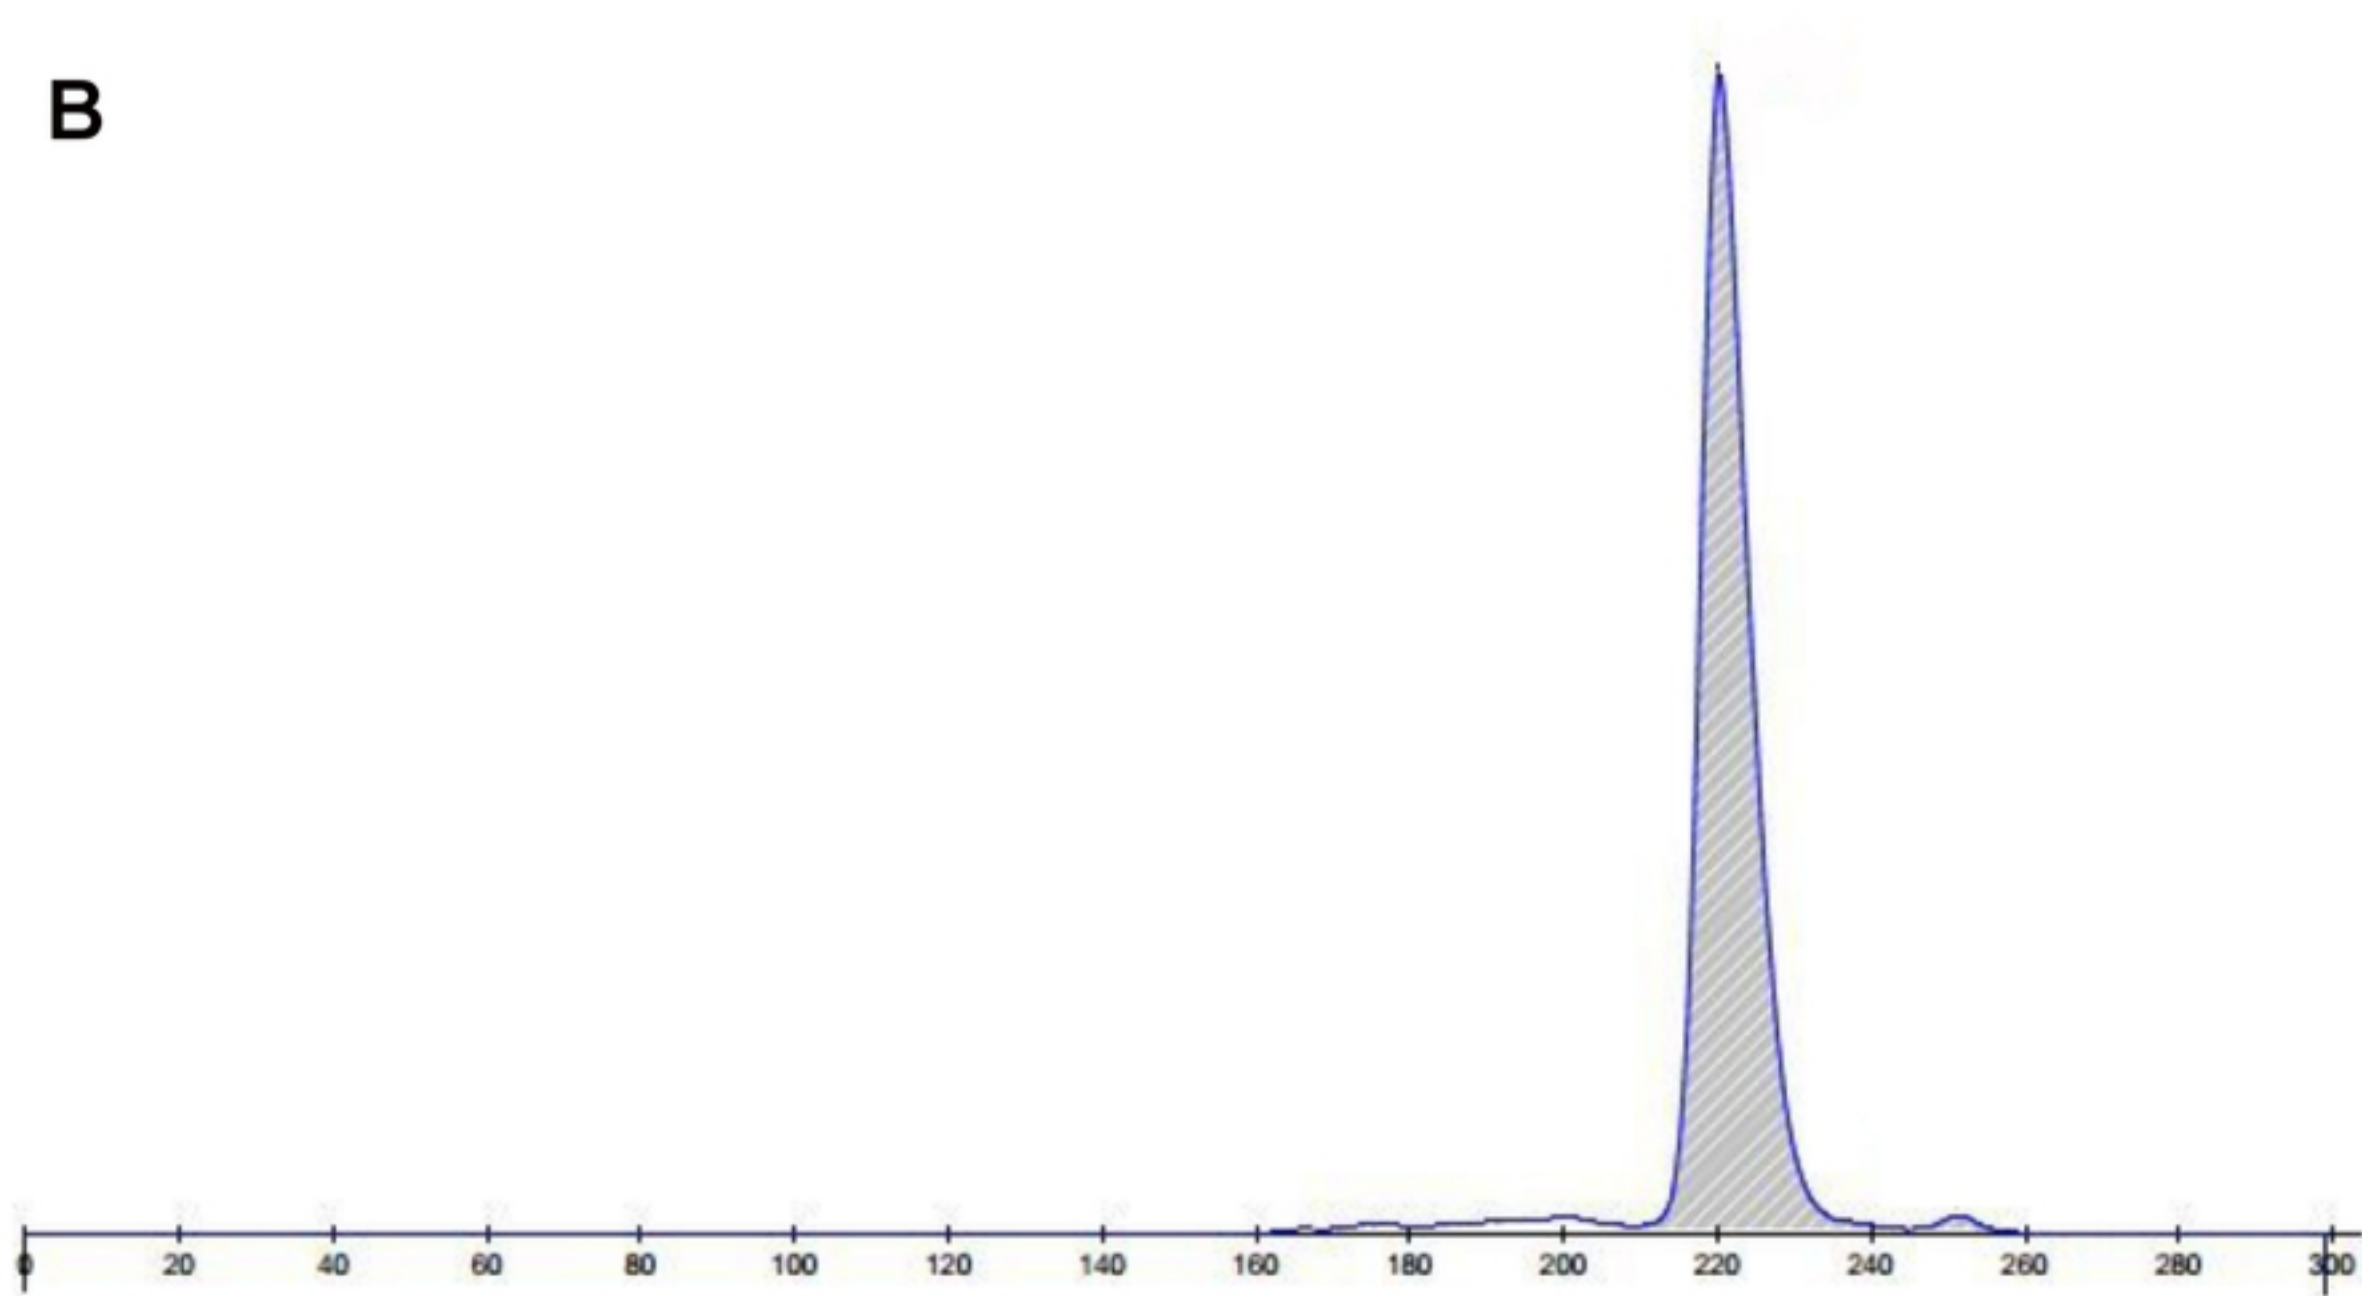**Fig 1**

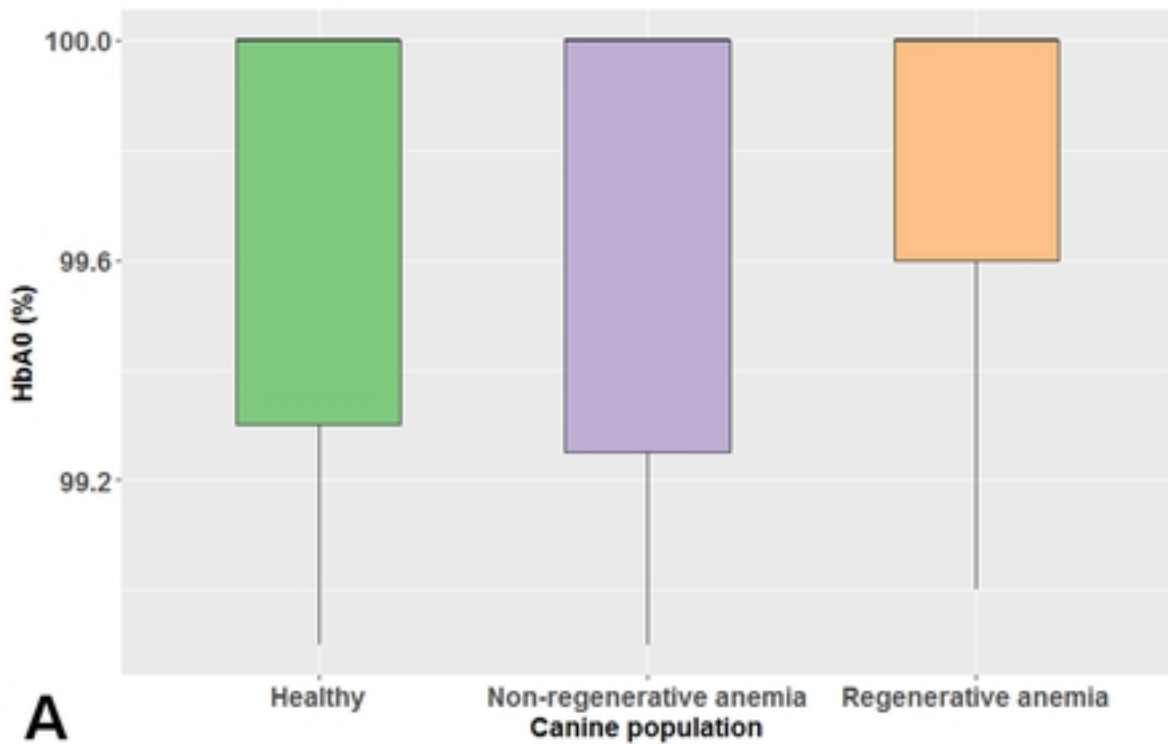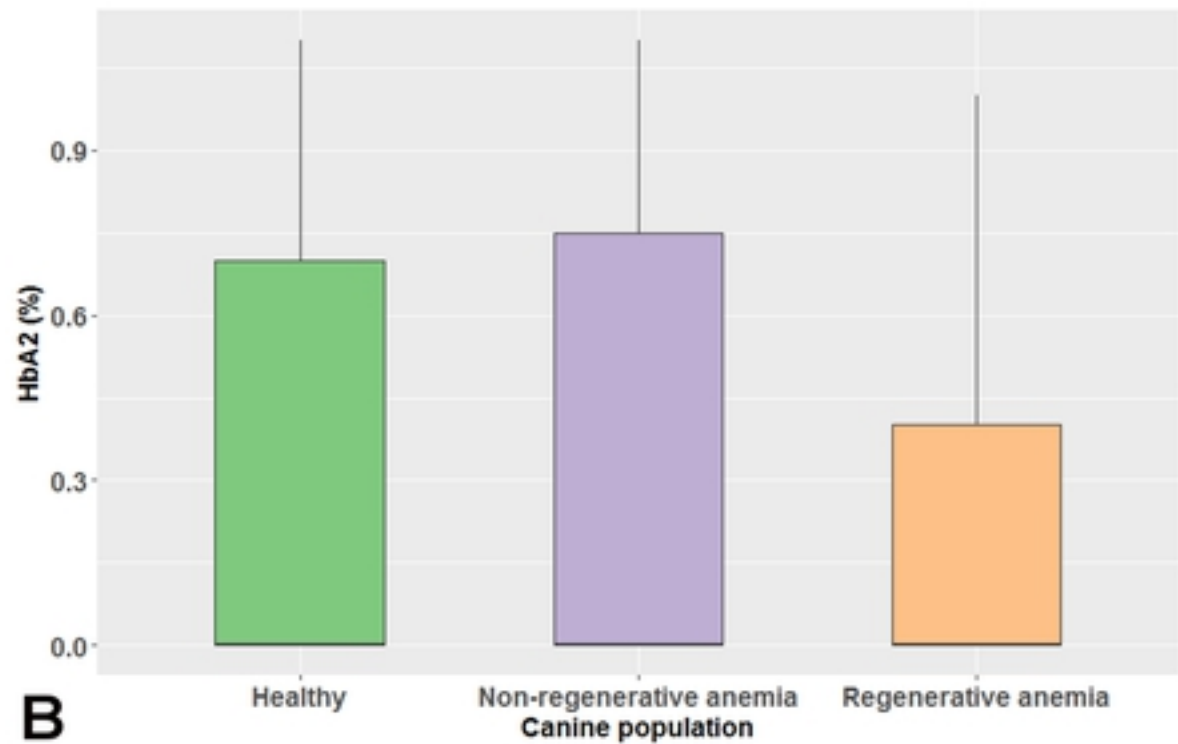

Fig 2
